# Supplementary material for: The Reduced Longitudinal Growth Induced by Overexpression of pPLAIIIγ Is Regulated by Genes Encoding Microtubule-Associated Proteins
Source: MDPI journal article supplement (doi:10.3390/plants10122615), 2021-11-28
Supplement: s1 [file s1]

**Table S1.** List of DNA primers used in this study for confirmation of gene insertion and polymerase chain reaction

| Gene              | Accession No. | Annotation                  | Primers used (5' - 3')                        |
|-------------------|---------------|-----------------------------|-----------------------------------------------|
| <i>pPLAIIIγ</i>   | At4g29800     | pPLAIIIγ-F (qRT)            | GTC CAA CGT TAT CAA CGG CTC GAT               |
|                   |               | pPLAIIIγ-R (qRT)            | TCC TCC ACT TCC GCT CCC TGA TCT               |
|                   |               | pPLAIIIγ-KpnI-F (Cloning)   | TC GGT ACC GTC TAA AAG CTA ACG ATT            |
|                   |               | pPLAIIIγ-AvrII-R (Cloning)  | GG CCT AGG TCT ATC TTT AGA TAT GAG            |
|                   |               | pPLAIIIγ-LP (SALK_088404)   | TATCATCGCAGCGAATACTCC                         |
|                   |               | pPLAIIIγ-RP (SALK_088404)   | TTGGAATCCATTTGGGAAAAG                         |
|                   |               | pPLAIIIγ-LP2 (SAIL_832_E01) | TATCATCGCAGCGAATACTCC                         |
|                   |               | pPLAIIIγ-RP2 (SAIL_832_E01) | TTGGAATCCATTTGGGAAAAG                         |
| <i>SALK T-DNA</i> | -             | LBb1.3_SALK                 | ATT TTG CCG ATT TCG GAA C                     |
| <i>SAIL T-DNA</i> | -             | LB2_SAIL                    | GCT TCC TAT TAT ATC TTC CCA AAT TAC CAA TAC A |
| <i>Actin</i>      | At5g09810     | Atactin-2F                  | GTG TGT CTT GTC TTA TCT GGT TCG               |
|                   |               | Atactin-2R                  | AAT AGC TGC ATT GTC ACC CGA TAC T             |
| <i>MAP18</i>      | At5g44610     | MAP18-F                     | AAG CCA GCT GTG GAA GA                        |
|                   |               | MAP18-R                     | TTC GGG AGC CTT AGT                           |
| <i>MAP20</i>      | At5g37478     | MAP20-F                     | CAA GGC AGC CAC GAC TAA GA                    |
|                   |               | MAP20-R                     | TGC ACG TTT CAC TGC TCT CT                    |
| <i>MAP65-1</i>    | At5g55230     | MAP65-1-F                   | ACA CAG CAT GTC CTT TGC CT                    |
|                   |               | MAP65-1-R                   | ACG CCG GTT ATG TGT TCC AT                    |
| <i>MAP70-1</i>    | At1g68060     | MAP70-1-F                   | CCG AAG TGG GTT AAC AAG GA                    |
|                   |               | MAP70-1-R                   | CAC ACC AGC CTA TAA CGG TTT                   |
| <i>MAP70-5</i>    | At4g17220     | MAP70-5-F                   | CTG TTT CCG AGA GAA CCG CT                    |
|                   |               | MAP70-5-R                   | TCT TTG AGC CAC CAC CAC TG                    |
| <i>PLDα1</i>      | At3g15730     | PLDα1-F                     | TCT CTG CTT TGC TGC TGT TGT AGC               |
|                   |               | PLDα1-R                     | CAC AAA GCT ACA TTC TCT CAC CAC GTC           |
| <i>PLDδ</i>       | At4g35790     | PLDδ-F                      | TGC CGG CGA TTG GGT TAG ATA                   |
|                   |               | PLDδ-R                      | GAG CAA TTC CCC AAG CGT CAT A                 |
| <i>PLDζ1</i>      | At3g16785     | PLDζ1-F                     | TGG ATG GCA ACC GCA AAG ACA A                 |

|                               |           |                 |                                 |
|-------------------------------|-----------|-----------------|---------------------------------|
|                               |           | PLD $\zeta$ 1-R | ATC GTT GTG TGT CCC AGC TTC T   |
| <i>PLD<math>\zeta</math>2</i> | At3g05630 | PLD $\zeta$ 2-F | TTT GAG GAC GGT CCA ATT GCC A   |
|                               |           | PLD $\zeta$ 2-R | ACA ACA CCG ATC TCA GAG TCT CGT |
| <i>ACS4</i>                   | At2g22810 | ACS4-F          | GGT TGG GAA GAG TAC GAG AAG     |
|                               |           | ACS4-R          | GCT GCG TCT GTG TTT TGT G       |
| <i>ACS5</i>                   | At5g65800 | ACS5-F          | TCA CGA ATC CAT CTA ACC CAC     |
|                               |           | ACS5-R          | CCC GAA CAT AGT GCC TGA ATA G   |
| <i>ACS11</i>                  | At4g08040 | ACS11-F         | GGT TTG TTC TGT TGG GTT GAC     |
|                               |           | ACS11-R         | AAT GAC ACG ATG AGC CTG G       |
| <i>ACO1</i>                   | At2g19590 | ACO1-F          | TGT CAG ATC CCA AAC ATT TCA G   |
|                               |           | ACO1-R          | GGG TAT TTA GCC ACT TTT GTT CC  |
| <i>ACO2</i>                   | At1g62380 | ACO2-F          | CGG GAA GTA TAA GAG TGT GCT G   |
|                               |           | ACO2-R          | GGG TAC TCG GAA TCT TTC TCG     |
| <i>ACO4</i>                   | At1g05010 | ACO4-F          | TTT CTA CCT CAA GCA CCT TCC     |
|                               |           | ACO4-R          | CGG CGA AGT CTT TCA TTA ACG     |
