# Supplementary material for: The Reduced Longitudinal Growth Induced by Overexpression of pPLAIIIγ Is Regulated by Genes Encoding Microtubule-Associated Proteins
Source: MDPI journal article supplement (doi:10.3390/plants10122615), 2021-11-28
Supplement: s1 [file s1]

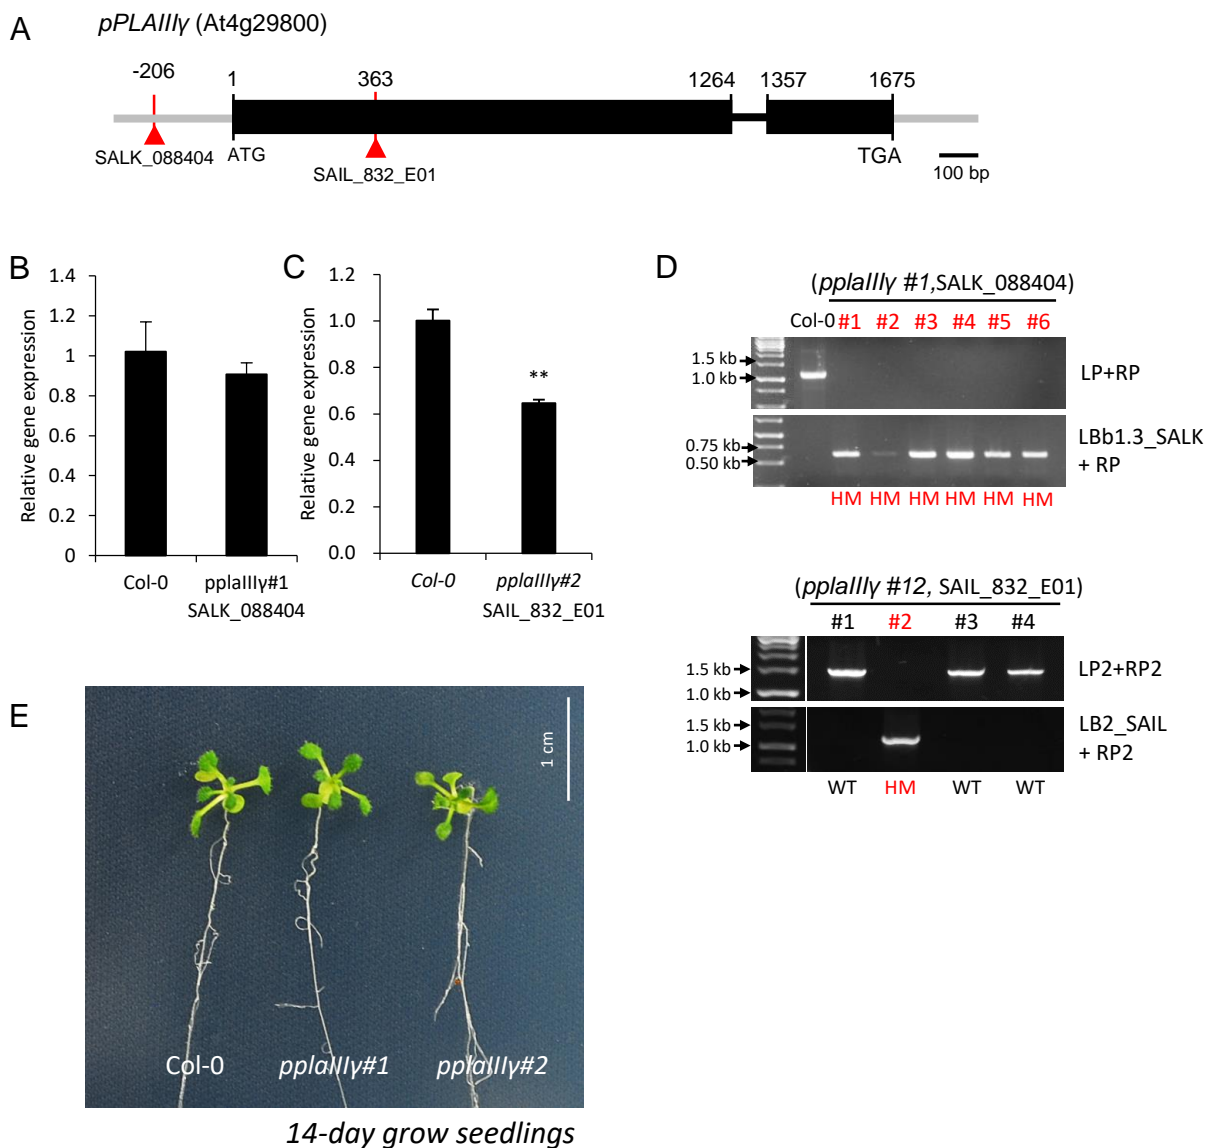

**Figure S1.** Analysis of T-DNA insertion lines in *pPLAIIly* gene. (A) Genomic structure of *pPLAIIly* (At4g29800) and the T-DNA insertions is marked with red-filled triangle. Black boxes: exon, black line: intron, and grey lines: UTR. (B and C) Expression level of *pPLAIIly* in Col-0 and two *pplalliy* T-DNA mutants. (B) *pplalliy*#1: SALK\_088404. (C) *pplalliy*#2: SAIL\_832\_E01. Data represent the average  $\pm$  SE from three independent replicates at  $P < 0.05$  (\*) and  $P < 0.01$  (\*\*), respectively. (D) Genotyping PCR of the T-DNA insertion among independent *pplalliy* mutants. HM: homozygous T-DNA insertion, WT: wild type. (E) No phenotypic difference was observed in *pplalliy* mutant lines. Scale bar = 1 cm.
